# Supplementary material for: Epidemiology of Cancer-Associated Venous Thromboembolism in Patients With Solid and Hematologic Neoplasms in the Veterans Affairs Health Care System
Source: PubMed Central journal article supplement (PMC10261992; doi:10.1001/jamanetworkopen.2023.17945), 2023-06-12
Supplement: jamanetwopen-e2317945-s001.pdf [file jamanetwopen-e2317945-s001.pdf]

## Supplemental Online Content

Martens KL, Li A, La J, et al. Epidemiology of cancer-associated venous thromboembolism in patients with solid and hematologic neoplasms in the Veterans Affairs Health Care System. *JAMA Netw Open*. 2023;6(6):e2317945. doi:10.1001/jamanetworkopen.2023.17945

**eMethods.** Data Extraction and Harmonization for the Veterans Affairs Healthcare System

**eReferences.**

**eTable 1.** Systemic Therapy Classifications

**eTable 2.** Cumulative Incidence of VTE at 6 and 12 Months by Diagnosis Year

**eTable 3.** Cumulative Incidence of VTE at 1 Year by Cancer Type

**eTable 4.** Cumulative Incidence of VTE at 1 Year by Cancer Stage

**eTable 5.** Cumulative Incidence of VTE at 1 Year by Race and Ethnicity

**eTable 6.** Multivariable Cox Regression Analysis for Association With Overall Mortality

**eFigure 1.** Consort Diagram

**eFigure 2.** Cumulative Incidence of VTE at 1 Year by Cancer Stage

**eFigure 3.** Cumulative Incidence of VTE At 1 Year by Cancer Type and Race and Ethnicity

This supplemental material has been provided by the authors to give readers additional information about their work.

## **eMethods. Data extraction and harmonization for the Veterans Affairs healthcare system**

### **Data source and linkage**

This study utilizes patient-level data from the Veterans Affairs (VA) healthcare system, which is the largest integrated healthcare system with 171 medical centers and 1,113 outpatient clinics for veterans in the United States (US).

Linkage at the patient level was achieved by matching unique identifiers between electronic health record data collated in the VA Corporate Data Warehouse (CDW) and national VA Cancer Registry data, which is also available in the CDW (oncology domain) from 2006-2021.

Data extracted from the VA Cancer Registry included cancer histology, American Joint Committee on Cancer (AJCC) staging, demographics, and mortality. Data extracted from the CDW included socioeconomic factors, clinical encounter, medical history, problem list, medication, International Classification of Diseases Clinical Modification (ICD-9-CM and ICD-10-CM) diagnosis and procedure codes, Current Procedural Terminology/Healthcare Common Procedure Coding System (CPT/HCPCS) procedure codes, discharge summary, clinic notes, and radiology reports.

### **Cohort selection (eFigure 1)**

Cancer Registry exclusions required patients to have a first-ever histologically confirmed invasive cancer diagnosis. CDW exclusions required patients to be primary user, and not having had recent diagnosis of acute venous thromboembolism (VTE) in the preceding 180 days (eFigure 1).

### **Index date and follow-up**

Outcome was evaluated from the index date of histologic cancer diagnosis until first outcome event, death, loss of follow-up defined as a 90-day gap without any clinical encounters, or administrative censoring on 4/1/2022.

### **Outcome variables**

Primary outcome: *overall VTE* was defined as a composite outcome of radiologically confirmed symptomatic or incidental pulmonary embolism (PE), proximal or distal lower extremity DVT (LE-DVT), or upper extremity catheter-related DVT (CR-DVT) after index date.

Secondary outcome: *PE/LE-DVT* was defined as an important subgroup of the primary outcome (excluding CR-DVT). Please refer to the online Data Supplement from our previous publication for detailed cohort definition and validation where the weighted sensitivity was 96% and weighted positive predicted value was 91% [1].

### **Baseline variables**

#### Cancer site/histology subtype:

Cancer site and histology were recoded from VA Cancer Registry at the time of diagnosis according to the SEER standard ICD-O-3 recode for common solid tumors and rare disease classification for hematologic malignancies and rare histology like leukemia, lymphoma, sarcoma and neuroendocrine [2, 3].

#### Cancer Stage:

AJCC cancer staging (I, II, III, IV, unknown) at the time of cancer diagnosis was extracted from the VA Cancer Registry. Certain cancers had unknown stage when AJCC classification was not appropriate (e.g. brain cancer, leukemia, myeloma) for which SEER staging was used.

#### Treatment Regimen (supplemental Table 2):

First-line systemic therapy extracted from the VA CDW and classified as chemotherapy, immune checkpoint inhibitor, target therapy, or endocrine therapy. See supplemental Table 2 for detailed breakdown by generic drug name.

#### Age:

Age in years was extracted directly from the CDW at the time of cancer diagnosis.

#### Sex:

Sex was extracted directly from the CDW at the time of cancer diagnosis.

#### Race/Ethnicity:

Race/ethnicity was extracted from the VA Cancer Registry and CDW (SPatient) and recoded as Non-Hispanic White, Non-Hispanic Black, Hispanic, Non-Hispanic Asian, Pacific Islander, Alaskan Natives, American Indian (altogether classified as API), or Other/Unknown.

#### Region and Rurality:

Region and rurality were extracted directly from the CDW at the time of cancer diagnosis.

#### National Area Deprivation Index (ADI) score:

To determine socioeconomic status, patients' home addresses were geocoded and linked to corresponding census block groups. These block groups were mapped to the area deprivation index (ADI), which is derived using 17 weighted indicators from US Census American Community Survey 5-year estimates (poverty, housing, employment, education) and divided into quartiles based on the national ADI scores distribution, with higher scores indicating more disadvantaged neighborhoods [4, 5].

#### National Cancer Institute Comorbidity Index (NCI-CI):

Individual comorbidities, including history of paralysis, were determined from the NCI-CI within a 12-month lookback window before the diagnosis date using inpatient and outpatient facility coded diagnoses extracted from the VA CDW [6].

#### History of PE/LE-DVT:

ICD codes for VTE any time prior to diagnosis were extracted from the VA CDW. These were not confirmed with chart review. Please refer to the online Data Supplement from our previous publication for exact codes and timing use [1].

#### Prolonged hospitalization:

Prolonged hospitalization  $\geq 3$  days was extracted from the VA CDW prior to diagnosis within a 3-month lookback window.

#### Anticoagulation/antiplatelet prescription:

Anticoagulation/antiplatelet prescription data was extracted from the VA CDW prior to diagnosis within a 6-month lookback window from the outpatient settings.

#### Body Mass Index:

Data calculated from the VA CDW using any height and the closest weight prior to diagnosis within a 36-month lookback window.

#### White blood cell (WBC) count:

Data captured from the VA CDW using the closest WBC within a window between 3-month prior to 1-month after the diagnosis date. If multiple values were present, then the one closest to the index date was used.

#### Hemoglobin:

Data captured from the VA CDW using the closest hemoglobin within a window between 3-month prior to 1-month after the diagnosis date. If multiple values were present, then the one closest to the index date was used.

#### Platelet count:

Data captured from the VA CDW using the closest platelet count within a window between 3-month prior to 1-month after the diagnosis date. If multiple values were present, then the one closest to the index date was used.

#### **Missing data**

Missing data were classified as a categorical variable "NA" in our study, so the final multivariable model is run on the entire dataset without imputation or exclusion.

## eReferences

1. Li A, La J, May SB, et al. Derivation and Validation of a Clinical Risk Assessment Model for Cancer-Associated Thrombosis in Two Unique US Health Care Systems. *J Clin Oncol*. 2023 Jan 10;JCO2201542.
2. National Cancer Institute (NCI): Site Recode ICD-O-3/WHO 2008 Definition [Internet]. *Surveillance, Epidemiol End Results Progr* , 2021[cited 2023 Feb 1] Available from:[https://seer.cancer.gov/siterecode/icdo3\\_dwho/home/index.html](https://seer.cancer.gov/siterecode/icdo3_dwho/home/index.html)
3. National Cancer Institute (NCI): Rare Cancer Classification [Internet]. *Surveillance, Epidemiol End Results Progr* , 2021[cited 2023 Feb 1] Available from: <https://seer.cancer.gov/seerstat/variables/seer/raesiterecode/>
4. Singh, G.K. Area deprivation and widening inequalities in US mortality, 1969-1998. *Am J Public Health*, 2003. 93(7): p. 1137-43.
5. Kind, A.J.H. and W.R. Buckingham. *Making Neighborhood-Disadvantage Metrics Accessible - The Neighborhood Atlas*. *N Engl J Med* 2018. 378(26): p. 2456-2458.
6. National Cancer Institute (NCI): NCI Comorbidity Index 2021 Version [Internet]. *Div Cancer Control Popul Sci* 2021; Available from: <https://healthcaredelivery.cancer.gov/seermedicare/considerations/macro-2021.html>.

eTable 1. Systemic Therapy Classifications

| <b>Drug name (generic)</b> | <b>Drug class (proposed)</b> |
|----------------------------|------------------------------|
| abemaciclib                | target                       |
| abiraterone                | endo                         |
| acalabrutinib              | target                       |
| ado-trastuzumab            | target                       |
| afatinib                   | target                       |
| alectinib                  | target                       |
| alitretinoin               | target                       |
| alpelisib                  | target                       |
| anastrozole                | endo                         |
| arsenic                    | target                       |
| asparaginase               | chemo                        |
| atezolizumab               | immuno                       |
| avelumab                   | immuno                       |
| axitinib                   | target                       |
| azacitidine                | chemo                        |
| bendamustine               | chemo                        |
| bevacizumab                | target                       |
| bexarotene                 | target                       |
| bicalutamide               | endo                         |
| binimetinib                | target                       |
| bleomycin                  | chemo                        |
| blinatumomab               | target                       |
| bortezomib                 | target                       |
| bosutinib                  | target                       |
| brentuximab                | target                       |
| cabazitaxel                | chemo                        |
| cabozantinib               | target                       |
| capecitabine               | chemo                        |
| carboplatin                | chemo                        |
| carfilzomib                | target                       |
| carmustine                 | chemo                        |
| cemiplimab-rwlc            | immuno                       |
| ceritinib                  | target                       |
| cetuximab                  | target                       |
| chlorambucil               | chemo                        |
| cisplatin                  | chemo                        |
| cladribine                 | chemo                        |
| clofarabine                | chemo                        |
| cobimetinib                | target                       |
| crizotinib                 | target                       |
| cyclophosphamide           | chemo                        |
| cytarabine                 | chemo                        |
| cytarabine/PF              | chemo                        |
| dabrafenib                 | target                       |
| dacarbazine                | chemo                        |
| dactinomycin               | chemo                        |
| daratumumab                | target                       |
| darolutamide               | endo                         |
| dasatinib                  | target                       |
| daunorubicin               | chemo                        |
| decitabine                 | chemo                        |

|                 |        |
|-----------------|--------|
| degarelix       | endo   |
| docetaxel       | chemo  |
| doxorubicin     | chemo  |
| durvalumab      | immuno |
| elotuzumab      | target |
| enasidenib      | target |
| encorafenib     | target |
| enzalutamide    | endo   |
| epirubicin      | chemo  |
| erdafitinib     | target |
| eribulin        | chemo  |
| erlotinib       | target |
| etoposide       | chemo  |
| everolimus      | target |
| exemestane      | endo   |
| fam-trastuzumab | target |
| fludarabine     | chemo  |
| fluorouracil    | chemo  |
| flutamide       | endo   |
| fulvestrant     | endo   |
| gemcitabine     | chemo  |
| gemtuzumab      | target |
| goserelin       | endo   |
| hydroxyurea     | chemo  |
| ibrutinib       | target |
| idarubicin      | chemo  |
| idelalisib      | target |
| ifosfamide      | chemo  |
| imatinib        | target |
| inotuzumab      | target |
| interferon      | target |
| irinotecan      | chemo  |
| ivosidenib      | target |
| ixabepilone     | chemo  |
| ixazomib        | target |
| lapatinib       | target |
| larotrectinib   | target |
| lenalidomide    | target |
| lenvatinib      | target |
| letrozole       | endo   |
| leuprolide      | endo   |
| lomustine       | chemo  |
| lorlatinib      | target |
| mercaptopurine  | chemo  |
| methotrexate    | chemo  |
| midostaurin     | target |
| mitomycin       | chemo  |
| mitotane        | endo   |
| mitoxantrone    | chemo  |
| nelarabine      | chemo  |
| neratinib       | target |
| nilotinib       | target |
| niraparib       | target |

|                        |        |
|------------------------|--------|
| nivolumab              | immuno |
| obinutuzumab           | target |
| ofatumumab             | target |
| olaparib               | target |
| olaratumab             | target |
| osimertinib            | target |
| oxaliplatin            | chemo  |
| paclitaxel             | chemo  |
| palbociclib            | target |
| panitumumab            | target |
| panobinostat           | target |
| pazopanib              | target |
| pegaspargase           | chemo  |
| peginterferon          | target |
| pembrolizumab          | immuno |
| pemetrexed             | chemo  |
| pertuzumab             | target |
| polatuzumab            | target |
| pomalidomide           | target |
| ponatinib              | target |
| procarbazine           | chemo  |
| ramucirumab            | target |
| regorafenib            | target |
| ribociclib             | target |
| rituximab              | target |
| romidepsin             | target |
| ruxolitinib            | target |
| sacituzumab            | target |
| selpercatinib          | target |
| sorafenib              | target |
| sunitinib              | target |
| tafasitamab-cxix       | target |
| talazoparib            | target |
| tamoxifen              | endo   |
| temozolomide           | chemo  |
| temsirolimus           | target |
| thiotepa               | chemo  |
| topotecan              | chemo  |
| trabectedin            | chemo  |
| trametinib             | target |
| trastuzumab            | target |
| trastuzumab-anns       | target |
| tretinoin              | target |
| trifluridine/tipiracil | chemo  |
| triptorelin            | endo   |
| tucatinib              | target |
| vemurafenib            | target |
| venetoclax             | target |
| vinblastine            | chemo  |
| vincristine            | chemo  |
| vinorelbine            | chemo  |
| vismodegib             | target |
| vorinostat             | target |

|                                |        |
|--------------------------------|--------|
| alemtuzumab                    | target |
| capmatinib                     | target |
| daratumumab-hyaluronidase-fihj | target |
| decitabine/cedazuridine        | target |
| enfortumab                     | target |
| gilteritinib                   | target |
| ipilimumab                     | immuno |
| lurbinectedin                  | chemo  |
| mechlorethamine                | chemo  |
| melphalan                      | chemo  |
| pemigatinib                    | target |
| pentostatin                    | chemo  |
| pertuzumab-trastuzumab-hy-zzxf | target |
| ripretinib                     | target |
| rucaparib                      | target |
| siltuximab                     | target |
| sonidegib                      | target |
| valrubicin                     | chemo  |
| vandetanib                     | target |
| gefitinib                      | target |
| nilutamide                     | endo   |
| thioguanine                    | chemo  |
| toremifene                     | endo   |



eTable 2. Cumulative Incidence of VTE at 6 and 12 Months by Diagnosis Year

| <b>Diagnosis year</b> | <b>N (%)</b>  | <b>6-month<br/>CI VTE</b> | <b>12-month<br/>CI VTE</b> |
|-----------------------|---------------|---------------------------|----------------------------|
| 2006                  | 28,121 (6.5%) | 3.0%                      | 4.2%                       |
| 2007                  | 30,174 (6.9%) | 3.0%                      | 4.1%                       |
| 2008                  | 29,954 (6.9%) | 3.4%                      | 4.7%                       |
| 2009                  | 30,405 (7.0%) | 3.0%                      | 4.2%                       |
| 2010                  | 30,050 (6.9%) | 3.4%                      | 4.7%                       |
| 2011                  | 30,393 (7.0%) | 3.1%                      | 4.6%                       |
| 2012                  | 29,696 (6.8%) | 3.1%                      | 4.5%                       |
| 2013                  | 29,068 (6.7%) | 3.2%                      | 4.4%                       |
| 2014                  | 29,165 (6.7%) | 3.5%                      | 5.0%                       |
| 2015                  | 29,939 (6.9%) | 3.4%                      | 4.6%                       |
| 2016                  | 29,654 (6.8%) | 3.3%                      | 4.6%                       |
| 2017                  | 30,325 (7.0%) | 3.3%                      | 4.6%                       |
| 2018                  | 27,931 (6.4%) | 3.2%                      | 4.5%                       |
| 2019                  | 24,057 (5.5%) | 3.2%                      | 4.7%                       |
| 2020                  | 16,850 (3.9%) | 3.6%                      | 5.0%                       |
| 2021                  | 8,421 (1.9%)  | 3.5%                      | 4.7%                       |

Abbreviations: VTE, venous thromboembolism; CI, cumulative incidence

eTable 3. Cumulative Incidence of VTE at 1 Year by Cancer Type  
(A) Among all patients (n= 434,203)

| Cancer Type         | N       | CI VTE   |           | CI PE/LE-DVT |           |
|---------------------|---------|----------|-----------|--------------|-----------|
|                     |         | 6 months | 12 months | 6 months     | 12 months |
| ALL                 | 193     | 16.2%    | 18.6%     | 10.0%        | 11.8%     |
| pancreas            | 8,925   | 9.8%     | 12.1%     | 8.4%         | 10.3%     |
| brain               | 2,485   | 9.0%     | 11.1%     | 8.2%         | 10.1%     |
| bile & gallbladder  | 2,546   | 6.7%     | 9.1%      | 5.7%         | 8.1%      |
| aggressive NHL      | 5,351   | 8.9%     | 11.0%     | 6.3%         | 7.9%      |
| upper GI            | 13,399  | 7.6%     | 10.0%     | 5.8%         | 7.7%      |
| myeloma             | 6,470   | 4.9%     | 7.7%      | 3.9%         | 6.4%      |
| Hodgkin lymphoma    | 1,129   | 6.7%     | 9.5%      | 4.3%         | 6.3%      |
| lung                | 7,544   | 5.2%     | 6.9%      | 4.2%         | 5.6%      |
| lower GI            | 29,580  | 4.7%     | 6.7%      | 3.7%         | 5.3%      |
| sarcoma             | 3,017   | 4.4%     | 6.2%      | 3.4%         | 5.0%      |
| bladder             | 15,040  | 3.8%     | 5.8%      | 3.1%         | 4.8%      |
| gynecologic         | 1,246   | 3.1%     | 4.9%      | 3.0%         | 4.7%      |
| miscellaneous solid | 13,763  | 4.7%     | 6.0%      | 3.7%         | 4.7%      |
| testicular          | 1,006   | 4.0%     | 5.3%      | 3.0%         | 3.6%      |
| neuroendocrine      | 6,831   | 3.2%     | 4.3%      | 2.7%         | 3.6%      |
| kidney              | 18,315  | 3.0%     | 3.9%      | 2.6%         | 3.5%      |
| AML                 | 2,657   | 6.4%     | 7.3%      | 3.1%         | 3.6%      |
| indolent NHL        | 8,987   | 3.3%     | 4.5%      | 2.3%         | 3.2%      |
| head & neck         | 25,486  | 3.0%     | 4.1%      | 2.0%         | 2.6%      |
| breast              | 5,075   | 1.9%     | 3.4%      | 1.2%         | 2.4%      |
| liver               | 17,406  | 1.8%     | 2.7%      | 1.6%         | 2.3%      |
| MDS                 | 4,897   | 1.6%     | 2.7%      | 1.1%         | 2.0%      |
| CLL                 | 6,486   | 1.1%     | 2.0%      | 0.9%         | 1.6%      |
| CML                 | 3,840   | 1.0%     | 2.1%      | 0.8%         | 1.6%      |
| melanoma            | 16,702  | 0.9%     | 1.7%      | 0.8%         | 1.4%      |
| prostate            | 133,085 | 0.9%     | 1.5%      | 0.8%         | 1.3%      |
| thyroid             | 4,845   | 1.0%     | 1.6%      | 0.8%         | 1.2%      |

(B) Among patients treated with systemic therapy within first 90 days (n= 118,731)

| Cancer Type         | N     | CI VTE   |           | CI PE/LE-DVT |           |
|---------------------|-------|----------|-----------|--------------|-----------|
|                     |       | 6 months | 12 months | 6 months     | 12 months |
| ALL                 | 147   | 20.5%    | 22.7%     | 12.3%        | 13.8%     |
| pancreas            | 3611  | 13.4%    | 17.3%     | 11.3%        | 14.7%     |
| brain               | 1351  | 10.9%    | 13.7%     | 10.3%        | 12.8%     |
| bile & gallbladder  | 696   | 10.6%    | 14.4%     | 9.1%         | 12.8%     |
| aggressive NHL      | 3819  | 10.9%    | 13.2%     | 7.7%         | 9.5%      |
| upper GI            | 6190  | 10.5%    | 13.9%     | 7.7%         | 10.4%     |
| myeloma             | 3594  | 5.9%     | 9.4%      | 4.9%         | 7.9%      |
| Hodgkin lymphoma    | 788   | 8.1%     | 10.6%     | 5.1%         | 7.0%      |
| lung                | 24938 | 7.9%     | 10.3%     | 6.2%         | 8.2%      |
| lower GI            | 8737  | 6.8%     | 9.9%      | 5.2%         | 7.7%      |
| sarcoma             | 320   | 11.1%    | 12.5%     | 6.3%         | 7.0%      |
| bladder             | 4667  | 5.4%     | 7.7%      | 4.3%         | 6.2%      |
| gynecologic         | 154   | 12.5%    | 15.3%     | 11.1%        | 13.9%     |
| miscellaneous solid | 3598  | 7.8%     | 9.9%      | 5.4%         | 7.0%      |
| testicular          | 264   | 11.3%    | 12.7%     | 8.1%         | 8.6%      |
| neuroendocrine      | 1216  | 8.0%     | 10.0%     | 6.2%         | 7.8%      |
| kidney              | 1541  | 7.8%     | 9.6%      | 6.8%         | 8.2%      |
| AML                 | 1564  | 8.8%     | 9.7%      | 4.1%         | 4.7%      |
| indolent NHL        | 3609  | 5.4%     | 6.9%      | 3.5%         | 4.6%      |
| head & neck         | 9111  | 4.5%     | 5.9%      | 2.7%         | 3.5%      |
| breast              | 1971  | 3.1%     | 4.7%      | 1.9%         | 3.0%      |
| liver               | 4839  | 2.5%     | 3.7%      | 2.2%         | 3.2%      |
| MDS                 | 1227  | 2.9%     | 4.5%      | 1.9%         | 3.2%      |
| CLL                 | 769   | 3.6%     | 4.5%      | 2.5%         | 3.3%      |
| CML                 | 2635  | 0.9%     | 1.9%      | 0.7%         | 1.4%      |
| melanoma            | 1332  | 2.3%     | 3.2%      | 1.9%         | 2.9%      |
| prostate            | 25931 | 1.1%     | 2.1%      | 1.0%         | 1.9%      |
| thyroid             | 112   | 3.6%     | 6.7%      | 1.8%         | 3.9%      |

Abbreviations:  
CI, cumulative incidence; VTE, venous

thromboembolism; PE/LE-DVT, pulmonary embolism / lower-extremity deep venous thrombosis; ALL, acute lymphocytic leukemia; NHL, non-Hodgkin lymphoma; GI, gastrointestinal; AML, acute myeloid leukemia; MDS, myelodysplastic syndrome; CLL, chronic lymphocytic leukemia; CML, chronic myeloid leukemia

eTable 4. Cumulative Incidence of VTE by Cancer Stage

| <b>Cancer Type</b>  | <b>Stage I-II</b> | <b>Stage III-IV</b> |
|---------------------|-------------------|---------------------|
| ALL                 | 29 (13.8%)        | 164 (19.3%)         |
| pancreas            | 3123 (9.9%)       | 5802 (13.2%)        |
| brain               | 2437 (11.0%)      | 48 (14.7%)          |
| bile & gallbladder  | 1362 (7.7%)       | 1184 (10.8%)        |
| aggressive NHL      | 2137 (9.4%)       | 3214 (12.1%)        |
| upper GI            | 5652 (8.4%)       | 7747 (11.2%)        |
| myeloma             | 0 (0.0%)          | 6470 (7.7%)         |
| Hodgkin lymphoma    | 524 (10.2%)       | 605 (8.9%)          |
| lung                | 29152 (4.6%)      | 46289 (8.2%)        |
| lower GI            | 17279 (4.8%)      | 12301 (9.0%)        |
| sarcoma             | 2303 (5.0%)       | 714 (9.7%)          |
| bladder             | 12411 (4.0%)      | 2629 (13.6%)        |
| gynecologic         | 951 (2.6%)        | 295 (12.1%)         |
| miscellaneous solid | 11685 (5.7%)      | 2078 (7.5%)         |
| testicular          | 918 (3.6%)        | 88 (22.0%)          |
| neuroendocrine      | 4579 (3.4%)       | 2252 (6.2%)         |
| kidney              | 13747 (2.6%)      | 4568 (7.9%)         |
| AML                 | 0 (0.0%)          | 2657 (7.3%)         |
| indolent NHL        | 4052 (3.1%)       | 4935 (5.6%)         |
| head & neck         | 10655 (2.5%)      | 14831 (5.2%)        |
| breast              | 4309 (2.9%)       | 766 (6.3%)          |
| liver               | 12158 (2.1%)      | 5248 (4.0%)         |
| MDS                 | 0 (0.0%)          | 4897 (2.7%)         |
| CLL                 | 951 (1.4%)        | 5535 (2.1%)         |
| CML                 | 0 (0.0%)          | 3840 (2.1%)         |
| melanoma            | 14825 (1.2%)      | 1877 (4.8%)         |
| prostate            | 112538 (1.3%)     | 20547 (2.8%)        |
| thyroid             | 3760 (1.2%)       | 1085 (2.9%)         |

Abbreviations: VTE, venous thromboembolism; ALL, acute lymphocytic leukemia; NHL, non-Hodgkin lymphoma; GI, gastrointestinal; AML, acute myeloid leukemia; MDS, myelodysplastic syndrome; CLL, chronic lymphocytic leukemia; CML, chronic myeloid leukemia

eTable 5. Cumulative Incidence of VTE by Race and Ethnicity<sup>a</sup>

| Cancer Type         | Hispanic     | Non-Hispanic API | Non-Hispanic Black | Non-Hispanic White |
|---------------------|--------------|------------------|--------------------|--------------------|
| ALL                 | 15 (0.0%)    | 0 (0.0%)         | 17 (0.0%)          | 154 (17.5%)        |
| pancreas            | 417 (11.1%)  | 166 (10.1%)      | 1,720 (16.2%)      | 6,508 (11.2%)      |
| brain               | 119 (13.0%)  | 42 (0.0%)        | 274 (14.4%)        | 2,019 (10.7%)      |
| bile & gallbladder  | 195 (8.9%)   | 47 (0.0%)        | 455 (11.6%)        | 1,819 (8.7%)       |
| aggressive NHL      | 343 (9.7%)   | 127 (13.7%)      | 715 (12.8%)        | 4,113 (10.8%)      |
| upper GI            | 700 (10.0%)  | 241 (7.5%)       | 2,238 (11.0%)      | 10,074 (9.8%)      |
| myeloma             | 344 (7.3%)   | 132 (4.2%)       | 2,014 (7.9%)       | 3,903 (7.8%)       |
| Hodgkin lymphoma    | 77 (0.0%)    | 23 (0.0%)        | 208 (6.7%)         | 809 (11.1%)        |
| lung                | 1,704 (9.0%) | 1,112 (5.8%)     | 12,054 (9.0%)      | 59,860 (6.4%)      |
| lower GI            | 1,791 (7.1%) | 611 (5.3%)       | 5,388 (8.4%)       | 21,505 (6.2%)      |
| sarcoma             | 175 (6.9%)   | 59 (0.0%)        | 516 (9.0%)         | 2,241 (5.6%)       |
| bladder             | 517 (5.3%)   | 190 (6.1%)       | 1,416 (7.5%)       | 12,779 (5.6%)      |
| gynecologic         | 56 (0.0%)    | 39 (0.0%)        | 248 (3.1%)         | 888 (5.9%)         |
| miscellaneous solid | 664 (6.7%)   | 228 (3.7%)       | 2,226 (7.3%)       | 10,516 (5.7%)      |
| testicular          | 105 (4.5%)   | 22 (0.0%)        | 64 (0.0%)          | 807 (5.6%)         |
| neuroendocrine      | 355 (5.3%)   | 113 (5.3%)       | 1,519 (4.2%)       | 4,779 (4.3%)       |
| kidney              | 1,157 (3.6%) | 382 (5.2%)       | 3,700 (3.2%)       | 12,898 (4.1%)      |
| AML                 | 114 (10.7%)  | 53 (0.0%)        | 334 (7.2%)         | 2,130 (6.9%)       |
| indolent NHL        | 467 (5.2%)   | 152 (4.1%)       | 1,134 (4.8%)       | 7,152 (4.4%)       |
| head & neck         | 962 (5.0%)   | 377 (5.1%)       | 3,885 (4.8%)       | 20,006 (4.0%)      |
| breast              | 241 (2.3%)   | 145 (0.8%)       | 1,411 (3.9%)       | 3,225 (3.4%)       |
| liver               | 1,588 (3.1%) | 381 (1.7%)       | 4,281 (2.5%)       | 10,984 (2.7%)      |
| MDS                 | 206 (3.1%)   | 75 (0.0%)        | 532 (3.5%)         | 4,041 (2.6%)       |
| CLL                 | 197 (2.4%)   | 88 (0.0%)        | 743 (2.4%)         | 5,396 (2.0%)       |
| CML                 | 177 (0.6%)   | 68 (0.0%)        | 614 (2.0%)         | 2,944 (2.3%)       |
| melanoma            | 194 (3.7%)   | 168 (1.7%)       | 119 (4.8%)         | 16,094 (1.6%)      |
| prostate            | 6,952 (1.1%) | 2,221 (0.9%)     | 40,853 (1.6%)      | 81,932 (1.5%)      |
| thyroid             | 361 (1.3%)   | 152 (2.3%)       | 693 (1.6%)         | 3,581 (1.5%)       |

<sup>a</sup>Race/ethnicity groups with fewer than 100 events by specific cancer type were excluded from representation.

Abbreviations: VTE, venous thromboembolism; API, Asian Pacific Islander; ALL, acute lymphocytic leukemia; NHL, non-Hodgkin lymphoma; GI, gastrointestinal; AML, acute myeloid leukemia; MDS, myelodysplastic syndrome; CLL, chronic lymphocytic leukemia; CML, chronic myeloid leukemia

eTable 6. Multivariable Cox Regression Analysis for Association With Overall Mortality

| <b>Variables</b>                    | <b>Overall VTE<br/>HR (95% CI)</b> |
|-------------------------------------|------------------------------------|
| <b>Age</b> , every 10-year increase | 1.47 (1.47 - 1.48)                 |
| <b>Male sex</b>                     | 1.24 (1.21 - 1.28)                 |
| <b>Race/Ethnicity</b>               |                                    |
| Non-Hispanic White                  | Ref.                               |
| Non-Hispanic Black                  | 0.92 (0.91 - 0.93)                 |
| Hispanic                            | 0.81 (0.79 - 0.82)                 |
| Non-Hispanic API                    | 0.91 (0.88 - 0.94)                 |
| <b>Rurality</b>                     |                                    |
| Urban                               | Ref.                               |
| Rural                               | 0.97 (0.96 - 0.98)                 |
| Unknown                             | 1.04 (1.00 - 1.08)                 |
| <b>Region</b>                       |                                    |
| Continental                         | Ref.                               |
| Southeast                           | 0.97 (0.95 - 0.98)                 |
| Midwest                             | 0.96 (0.95 - 0.98)                 |
| North Atlantic                      | 0.93 (0.92 - 0.95)                 |
| Pacific                             | 0.99 (0.98 - 1.01)                 |
| <b>National ADI</b>                 |                                    |
| 0-25%                               | Ref.                               |
| 26-50%                              | 1.03 (1.01 - 1.04)                 |
| 51-75%                              | 1.06 (1.04 - 1.07)                 |
| 76-100%                             | 1.15 (1.13 - 1.16)                 |
| Unknown                             | 1.11 (1.07 - 1.14)                 |
| <b>NCI-CI</b>                       | 1.50 (1.49 - 1.51)                 |
| <b>Year of diagnosis</b>            | 0.98 (0.98 - 0.98)                 |
| <b>Khorana Score Predictors</b>     |                                    |
| BMI $\geq 35$ kg/m <sup>2</sup>     | 0.93 (0.92 - 0.94)                 |
| WBC $> 11 \times 10^9$ /L           | 1.28 (1.27 - 1.30)                 |
| Hgb $< 10$ g/dL                     | 1.37 (1.35 - 1.39)                 |
| Platelet $\geq 350 \times 10^9$ /L  | 1.29 (1.27 - 1.31)                 |
| <b>Additional VTE predictors</b>    |                                    |
| History of VTE                      | 1.11 (1.09 - 1.13)                 |
| History of paralysis                | 1.09 (1.05 - 1.14)                 |
| Recent hospitalization (90d)        | 1.45 (1.43 - 1.46)                 |
| <b>Baseline Anticoagulant</b>       |                                    |
| None                                | Ref.                               |
| Warfarin                            | 1.07 (1.05 - 1.09)                 |
| LMWH                                | 0.96 (0.92 - 1.00)                 |
| DOAC                                | 0.96 (0.93 - 1.00)                 |
| <b>Baseline Antiplatelet</b>        |                                    |
| None                                | Ref.                               |
| Aspirin                             | 1.05 (1.04 - 1.06)                 |
| P2Y12 inhibitor                     | 1.03 (1.01 - 1.05)                 |
| Aspirin + P2Y12 inhibitor           | 0.97 (0.91 - 1.03)                 |
| Other                               | 1.09 (1.04 - 1.14)                 |
| <b>Cancer Site</b>                  |                                    |
| Prostate                            | Ref.                               |
| CML                                 | 0.50 (0.48 - 0.53)                 |
| CLL                                 | 0.50 (0.48 - 0.52)                 |
| Thyroid                             | 0.87 (0.82 - 0.92)                 |
| Indolent NHL                        | 1.01 (0.97 - 1.04)                 |

|                                                                |                      |
|----------------------------------------------------------------|----------------------|
| Multiple myeloma                                               | 1.01 (0.98 - 1.05)   |
| Hodgkin lymphoma                                               | 1.06 (0.97 - 1.16)   |
| MDS                                                            | 1.11 (1.07 - 1.15)   |
| Testicular                                                     | 1.24 (1.05 - 1.45)   |
| Aggressive NHL                                                 | 1.51 (1.45 - 1.56)   |
| Melanoma                                                       | 1.67 (1.63 - 1.72)   |
| Breast                                                         | 1.72 (1.63 - 1.82)   |
| Head & neck                                                    | 1.95 (1.91 - 2.00)   |
| Kidney                                                         | 1.97 (1.92 - 2.02)   |
| Lower GI                                                       | 2.00 (1.96 - 2.04)   |
| Neuroendocrine                                                 | 2.08 (2.00 - 2.15)   |
| Gynecologic                                                    | 2.27 (2.05 - 2.51)   |
| Sarcoma                                                        | 2.45 (2.33 - 2.57)   |
| ALL                                                            | 2.54 (2.17 - 2.96)   |
| AML                                                            | 2.84 (2.72 - 2.97)   |
| Bladder                                                        | 2.86 (2.79 - 2.93)   |
| Miscellaneous solid                                            | 3.97 (3.87 - 4.07)   |
| Lung                                                           | 5.08 (5.00 - 5.16)   |
| Upper GI                                                       | 5.52 (5.40 - 5.65)   |
| Bile & gallbladder                                             | 6.32 (6.05 - 6.61)   |
| Liver                                                          | 7.08 (6.92 - 7.23)   |
| Brain                                                          | 8.09 (7.73 - 8.48)   |
| Pancreas                                                       | 10.05 (9.79 - 10.31) |
| <b>Cancer Stage</b>                                            |                      |
| Stage I                                                        | Ref.                 |
| Stage II                                                       | 1.58 (1.56 - 1.61)   |
| Stage III                                                      | 2.18 (2.15 - 2.21)   |
| Stage IV                                                       | 5.03 (4.97 - 5.10)   |
| Unknown                                                        | 2.15 (2.11 - 2.18)   |
| <b>First-line Systemic Therapy within 3 months<sup>a</sup></b> |                      |
| None                                                           | Ref.                 |
| Chemotherapy+                                                  | 0.89 (0.88 - 0.90)   |
| Immune checkpoint inhibitor+                                   | 0.80 (0.74 - 0.86)   |
| Targeted therapy+                                              | 0.94 (0.92 - 0.96)   |
| Endocrine therapy                                              | 1.32 (1.29 - 1.35)   |

Abbreviations: VTE, venous thromboembolism; HR, hazard ratio; CI, confidence interval; API, Asian Pacific Islander; ADI, area deprivation index; BMI, body mass index; WBC, white blood cell; Hgb, hemoglobin; NCI-CI, National Cancer Institute comorbidity index; LMWH, low molecular weight heparin; DOAC, direct oral anticoagulant; CML, chronic myeloid leukemia; CLL, chronic lymphocytic leukemia; NHL, non-Hodgkin lymphoma; MDS, myelodysplastic syndrome; GI, gastrointestinal; ALL, acute lymphocytic leukemia; AML, acute myeloid leukemia

<sup>a</sup>First-line systemic therapy was treated as a time-varying covariate in the analysis

eFigure 1. Consort Diagram

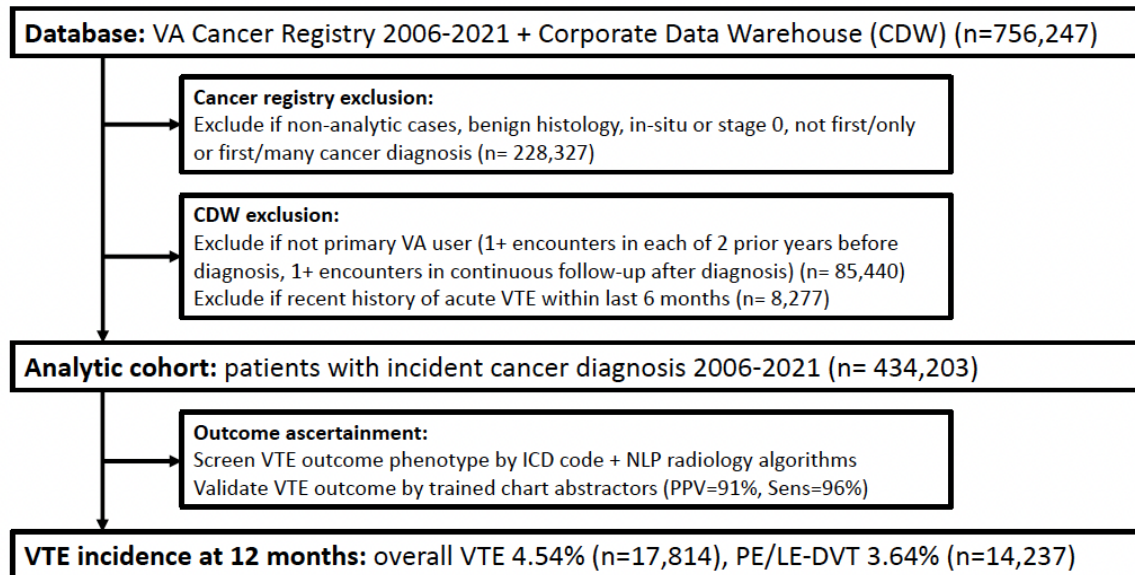

Patient linkage, data harmonization, cohort exclusion, and variable extraction are described in detail in data supplemental Method 1.



eFigure 2. Cumulative Incidence of VTE at 1 Year by Cancer Stage

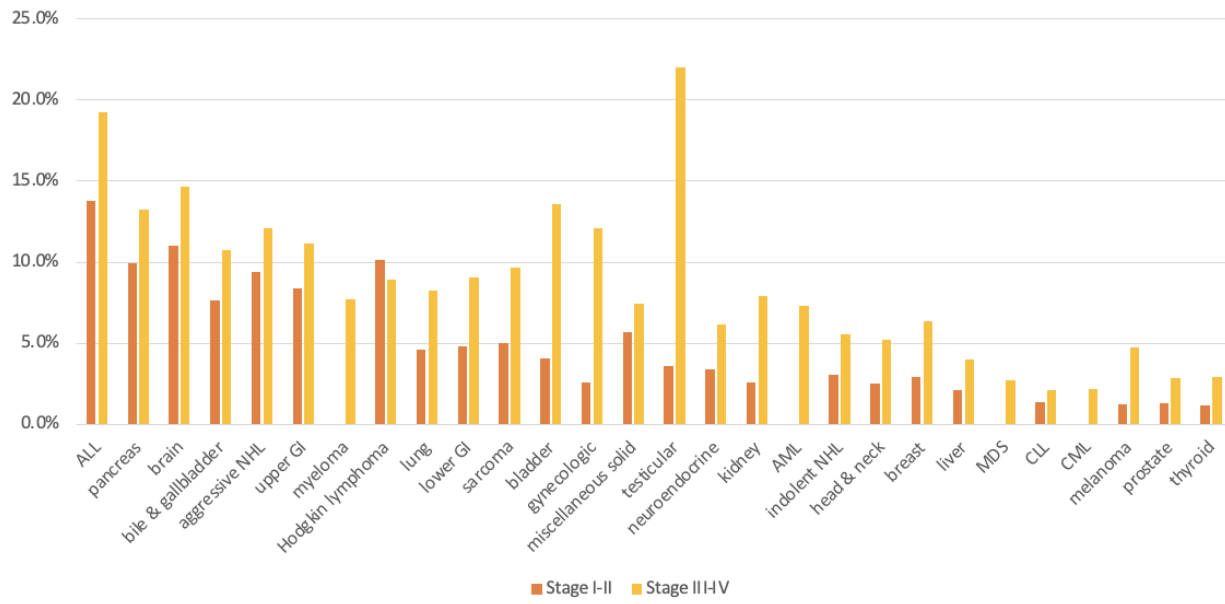

eFigure 3: Cumulative incidence of VTE at 1-year by cancer type and race/ethnicity<sup>a</sup>

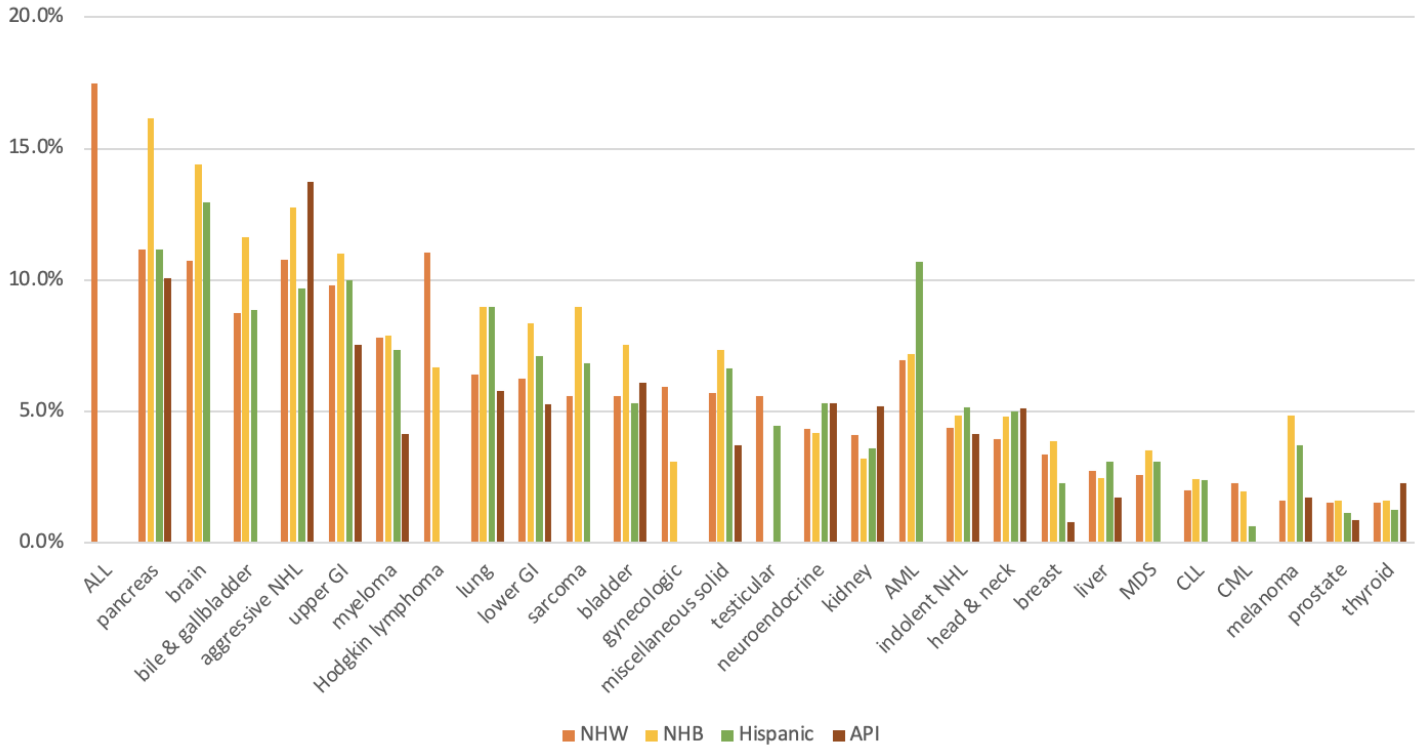

<sup>a</sup>Race/ethnicity groups with fewer than 100 events by specific cancer type were excluded from representation. Abbreviations: ALL, acute lymphocytic leukemia; NHL, non-Hodgkin lymphoma; GI, gastrointestinal; AML, acute myeloid leukemia; MDS, myelodysplastic syndrome; CLL, chronic lymphocytic leukemia; CML, chronic myeloid leukemia; NHW, Non-Hispanic White; NHB, Non-Hispanic Black, API, Asian Pacific Islander
