# Supplementary material for: Epidemiology of Cancer-Associated Venous Thromboembolism in Patients With Solid and Hematologic Neoplasms in the Veterans Affairs Health Care System
Source: PubMed Central journal article supplement (PMC10261992; doi:10.1001/jamanetworkopen.2023.17945), 2023-06-12
Supplement: jamanetwopen-e2317945-s002.pdf [file jamanetwopen-e2317945-s002.pdf]

## Data Sharing Statement

Martens. Epidemiology of Cancer-Associated Venous Thromboembolism in Patients With Solid and Hematologic Neoplasms in the Veterans Affairs Health Care System. *JAMA Netw Open*. Published June 12, 2023. doi:10.1001/jamanetworkopen.2023.17945

### Data

**Data available:** No

### Additional Information

**Explanation for why data not available:** VA data underlying this study can be made available to researchers with a VA IRB approved study protocol and data use agreement. Information is available at <https://www.virec.research.va.gov> or contact the VA Information Resource Center at [VIReC@va.gov](mailto:VIReC@va.gov).
